# Supplementary material
Source: PubMed Central journal article supplement (PMC4135751)
Supplement: AEM.01100-14_zam999105561so1.pdf [file AEM.01100-14_zam999105561so1.pdf]

TABLE S1 *Pseudomonas putida* NCIB 9816 NDO substrates

## Spiro, Bridged-linked, and Bridged Ring Structures

There are no known substrates in these three ring categories.

## Direct-linked Isolated Ring Structures

| Substrate Name     | Structure                                                                           | Reference |
|--------------------|-------------------------------------------------------------------------------------|-----------|
| biphenyl           | 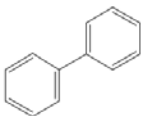   | (1)       |
| 3-hydroxy biphenyl |    | (2)       |
| flavone            |   | (3)       |
| isoflavone         |  | (3)       |
| 1-phenylpyrrole    |  | (4, 5)    |
| 1-phenylpyrazole   |  | (4, 5)    |
| 2-phenyl pyridine  |  | (5)       |

TABLE S1 NDO substrates (con't.)

| Fused Ring Structures            |                                                                                     |           |
|----------------------------------|-------------------------------------------------------------------------------------|-----------|
| Substrate Name                   | Structure                                                                           | Reference |
| naphthalene                      | 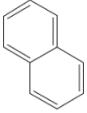   | (6)       |
| 1,2-dihydronaphthalene           |    | (7)       |
| indene                           |    | (8)       |
| indan                            |   | (8)       |
| 6,7-dihydro-5H-benzocycloheptene |  | (9)       |
| norcarane                        |  | (10)      |
| bicyclo[3.1.0]hexane             |  | (10)      |
| 2-methyl naphthalene             |  | (11)      |
| 1,5-dimethyl naphthalene         |  | (12)      |

TABLE S1 NDO substrates (con't.)

| Fused Ring Structures (con't.) |                                                                                     |           |
|--------------------------------|-------------------------------------------------------------------------------------|-----------|
| Substrate Name                 | Structure                                                                           | Reference |
| 1,8-dimethyl naphthalene       | 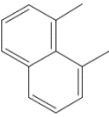   | (12)      |
| 2,7-dimethyl naphthalene       |    | (12)      |
| 2,6-dimethyl naphthalene       |    | (12)      |
| 2-methoxy naphthalene          |   | (13)      |
| 2-naphthoic acid               |  | (1)       |
| 1-bromonaphthalene             |  | (14)      |
| 2-bromonaphthalene             |  | (14)      |
| 1-indanone                     |  | (15)      |
| 2-indanone                     |  | (15)      |

TABLE S1 NDO substrates (con't.)

| Fused Ring Structures (con't.) |                                                                                     |           |
|--------------------------------|-------------------------------------------------------------------------------------|-----------|
| Substrate Name                 | Structure                                                                           | Reference |
| (1R)-indanol                   | 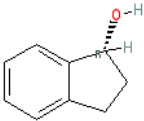   | (16)      |
| (1S)-indanol                   |    | (16)      |
| (1R)-indenol                   |    | (16)      |
| (1S)-indenol                   |   | (16)      |
| anthracene                     |  | (17)      |
| 9,10-dihydroanthracene         |  | (18)      |
| phenanthrene                   |  | (17)      |
| 9,10-dihydrophenanthrene       |  | (18)      |
| fluorene                       |  | (19)      |

TABLE S1 NDO substrates (con't.)

| Fused Ring Structures (con't.)     |                                                                                     |           |
|------------------------------------|-------------------------------------------------------------------------------------|-----------|
| Substrate Name                     | Structure                                                                           | Reference |
| acenaphthylene                     | 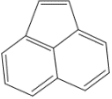   | (12)      |
| acenaphthene                       |    | (12)      |
| acenaphthen-1-ol                   |    | (12)      |
| fluoranthene                       |   | (20)      |
| benzo[a]pyrene                     |  | (20)      |
| Heterocyclic Fused Ring Structures |                                                                                     |           |
| Substrate Name                     | Structure                                                                           | Reference |
| chromane                           |  | (21)      |
| indole                             |  | (22)      |

TABLE S1 NDO substrates (con't.)

| Heterocyclic Fused Ring Structures (con't.) |                                                                                     |           |
|---------------------------------------------|-------------------------------------------------------------------------------------|-----------|
| Substrate Name                              | Structure                                                                           | Reference |
| indoline                                    | 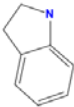   | (1)       |
| N-methylindole                              |    | (1)       |
| quinoline                                   |    | (23)      |
| 2-methylquinoline                           |    | (23)      |
| 4-methylquinoline                           |  | (23)      |
| 6-methylquinoline                           |  | (23)      |
| 8-methylquinoline                           |  | (23)      |
| isoquinoline                                |  | (23)      |
| 1-methylisoquinoline                        |  | (23)      |

TABLE S1 NDO substrates (con't.)

| Heterocyclic Fused Ring Structures (con't.) |                                                                                     |           |
|---------------------------------------------|-------------------------------------------------------------------------------------|-----------|
| Substrate Name                              | Structure                                                                           | Reference |
| 3-methylisoquinoline                        |    | (23)      |
| phthalazine                                 |    | (23)      |
| cinnoline                                   |    | (23)      |
| quinazoline                                 |   | (23)      |
| quinoxaline                                 |  | (23)      |
| 1,5-naphthyridine                           |  | (23)      |
| benzothiophene                              |  | (24)      |
| 2-methylbenzothiophene                      |  | (24)      |
| 3-methylbenzothiophene                      |  | (1)       |

TABLE S1 NDO substrates (con't.)

| Heterocyclic Fused Ring Structures (con't.) |                                                                                     |           |
|---------------------------------------------|-------------------------------------------------------------------------------------|-----------|
| Substrate Name                              | Structure                                                                           | Reference |
| dibenzo-1,4-dioxin                          | 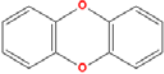   | (25)      |
| dibenzofuran                                |    | (19)      |
| carbazole                                   |    | (26)      |
| Benzo[ <i>h</i> ]quinoline                  |   | (5)       |
| Benzo[ <i>f</i> ]quinoline                  |  | (5)       |
| Phenanthridine                              |  | (5)       |
| Benzo[ <i>c</i> ]cinnoline                  |  | (5)       |
| dibenzothiophene                            |  | (19)      |



TABLE S1 NDO substrates (con't.)

| Single Ring Structures |                                                                                     |           |
|------------------------|-------------------------------------------------------------------------------------|-----------|
| Substrate Name         | Structure                                                                           | Reference |
| benzene                |    | (27)      |
| toluene                |    | (28)      |
| ethylbenzene           |    | (28)      |
| o-xylene               |    | (28)      |
| m-xylene               |  | (28)      |
| p-xylene               |  | (28)      |
| styrene                |  | (29)      |
| 1,2,4-trimethylbenzene |  | (12)      |
| dimethylfulvene        |  | (30)      |

TABLE S1 NDO substrates (con't.)

| Single Ring Structures (con't.) |                                                                                     |           |
|---------------------------------|-------------------------------------------------------------------------------------|-----------|
| Substrate Name                  | Structure                                                                           | Reference |
| 1,3 cyclohexadiene              |    | (30)      |
| 1,3 cycloheptadiene             |    | (30)      |
| cycloheptatriene                |    | (30)      |
| 1,3 cyclooctadiene              |    | (30)      |
| phenol                          |  | (31)      |
| o-cresol                        |  | (31)      |
| m-cresol                        |  | (31)      |
| p-cresol                        |  | (31)      |
| (S)-1-phenethyl alcohol         |  | (28)      |

TABLE S1 NDO substrates (con't.)

| Single Ring Structures (con't.) |                                                                                     |           |
|---------------------------------|-------------------------------------------------------------------------------------|-----------|
| Substrate Name                  | Structure                                                                           | Reference |
| 2-chlorophenol                  | 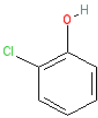   | (31)      |
| 3-chlorophenol                  |    | (31)      |
| 4-chlorophenol                  |    | (31)      |
| anisole                         |    | (12, 32)  |
| phenetole                       |  | (12, 32)  |
| acetophenone                    |  | (28)      |
| 1-methylpyridin-2-one           |  | (33)      |
| N-methylaniline                 |  | (1)       |
| N,N-dimethylaniline             |  | (1)       |

TABLE S1 NDO substrates (con't.)

| Single Ring Structures (con't.) |                                                                                     |           |
|---------------------------------|-------------------------------------------------------------------------------------|-----------|
| Substrate Name                  | Structure                                                                           | Reference |
| o-nitrotoluene                  | 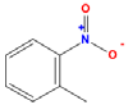   | (28)      |
| p-nitrotoluene                  |    | (28)      |
| m-nitrotoluene                  |    | (28)      |
| methyl phenyl sulfide           |    | (34, 35)  |
| ethyl phenyl sulfide            |  | (34, 35)  |
| n-propyl phenyl sulfide         |  | (35)      |
| i-propyl phenyl sulfide         |  | (35)      |
| n-butyl phenyl sulfide          |  | (35)      |
| ethenyl phenyl sulfide          |  | (35)      |

TABLE S1 NDO substrates (con't.)

| Single Ring Structures (con't.) |                                                                                     |           |
|---------------------------------|-------------------------------------------------------------------------------------|-----------|
| Substrate Name                  | Structure                                                                           | Reference |
| methyl p-tolyl sulfide          | 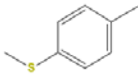   | (34, 35)  |
| p-methoxyphenyl methyl sulfide  |    | (34, 35)  |
| p-fluorophenyl methyl sulfide   |    | (35)      |
| p-chlorophenyl methyl sulfide   |    | (35)      |
| p-bromophenyl methyl sulfide    |  | (35)      |
| p-chlorophenyl ethyl sulfide    |  | (35)      |
| m-chlorophenyl methyl sulfide   |  | (35)      |
| o-chlorophenyl methyl sulfide   |  | (35)      |
| methyl p-nitrophenyl sulfide    |  | (34, 35)  |

TABLE S1 NDO substrates (con't.)

| Single Ring Structures (con't.)   |                                                                                     |           |
|-----------------------------------|-------------------------------------------------------------------------------------|-----------|
| Substrate Name                    | Structure                                                                           | Reference |
| methyl p-cyanophenyl sulfide      | 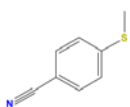   | (35)      |
| benzyl methyl sulfide             |    | (35)      |
| benzyl ethyl sulfide              |    | (35)      |
| [2-(methylsulfanyl)ethyl] benzene |   | (35)      |
| methyl thiocyclohexane            |  | (35)      |
| o-bromostyrene                    |  | (36)      |

TABLE S1 NDO substrates (con't.)

| Non-Ring Structures |                                                                                     |           |
|---------------------|-------------------------------------------------------------------------------------|-----------|
| Substrate Name      | Structure                                                                           | Reference |
| methylthiohexane    |  | (35)      |

methylthioheptane

(35)

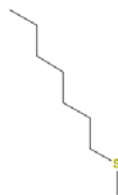

methylthiooctane

(35)

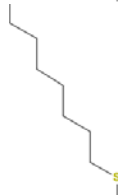

methylthiononane

(35)

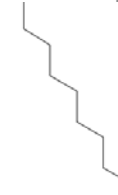

## References

1. **Resnick SM, Lee K, Gibson DT.** 1996. Diverse reactions catalyzed by naphthalene dioxygenase from *Pseudomonas* sp. strain NCIB 9816. *J. Ind. Microbiol.* **17**:438-457.
2. **Boyd D, Sharma N, Stevenson P, Blain M, McRoberts C, Hamilton J, Argudo J, Mundi H, Kulakov L, Allen C.** 2011. Dioxygenase-catalysed cis-dihydroxylation of meta-substituted phenols to yield cyclohexenone cis-diol and derived enantiopure cis-triol metabolites. *Org. Biomol. Chem.* **9**:1479-1490.
3. **Seo J, Kang S, Ryu J, Lee Y, Park K, Kim M, Won D, Park H, Ahn J, Chong Y, Kanaly R, Han J, Hur H.** 2010. Location of flavone B-ring controls regioselectivity and stereoselectivity of naphthalene dioxygenase from *Pseudomonas* sp strain NCIB 9816-4. *Appl. Microbiol. Biotechnol.* **86**:1451-1462.
4. **Thawng C, Ryu J, Han J, Cha C, Hur H.** 2011. Biotransformation of N-Heterocyclic Compounds 1-Phenylpyrazole and 1-Phenylpyrrole by *Escherichia coli* (pDTG141) Expressing Naphthalene Dioxygenase of *Pseudomonas* sp Strain NCIB 9816-4. *J. Korean Soc. Appl. Biol. Chem.* **54**:229-236.
5. **Boyd D, Sharma N, Coen G, Hemenstall F, Ljubez V, Malone J, Allen C, Hamilton J.** 2008. Regioselectivity and stereoselectivity of dioxygenase catalysed cis-dihydroxylation of mono- and tri-cyclic azaarene substrates. *Org. Biomol. Chem.* **6**:3957-3966.
6. **Jeffrey AM, Yeh HJC, Jerina DM, Patel TR, Davey JF, Gibson DT.** 1975. Initial reactions in oxidation of naphthalene by *Pseudomonas putida*. *Biochemistry* **14**:575-584.
7. **Torok DS, Resnick SM, Brand JM, Cruden DL, Gibson DT.** 1995. Desaturation and oxygenation of 1,2-dihydronaphthalene by toluene and naphthalene dioxygenase. *J. Bacteriol.* **177**:5799-5805.
8. **Gibson DT, Resnick SM, Lee K, Brand JM, Torok DS, Wackett LP, Schocken MJ, Haigler BE.** 1995. Desaturation, dioxygenation, and monooxygenation reactions catalyzed by naphthalene dioxygenase from *Pseudomonas* sp. Strain 9816-4. *J. Bacteriol.* **177**:2615-2621.
9. **Resnick S, Gibson D.** 1996. Oxidation of 6,7-dihydro-5H-benzocycloheptene by bacterial strains expressing naphthalene dioxygenase, biphenyl dioxygenase, and toluene dioxygenase yields homochiral monol or cis-diol enantiomers as major products. *Applied and Environmental Microbiology* **62**:1364-1368.
10. **Chakrabarty S, Austin RN, Deng DY, Groves JT, Lipscomb JD.** 2007. Radical intermediates in monooxygenase reactions of Rieske dioxygenases. *J. Am. Chem. Soc.* **129**:3514-+.
11. **Deluca ME, Hudlicky T.** 1990. Microbial oxidation of naphthalene derivatives - absolute-configuration of metabolites. *Tetrahedron Lett.* **31**:13-16.

12. **Selifonov S, Grifoll M, Eaton R, Chapman P.** 1996. Oxidation of naphthenoaromatic and methyl-substituted aromatic compounds by naphthalene 1,2-dioxygenase. *Appl. and Environ. Micro.* **62**:507-514.
13. **Whited GM, Corey Downie J, Hudlicky T, Fearnley SP, Dudding TC, Olivo HF, Parker D.** 1994. Oxidation of 2-methoxynaphthalene by toluene, naphthalene and biphenyl dioxygenases: structure and absolute stereochemistry of metabolites. *Bioorg. Med. Chem.* **2**:727-734.
14. **Hudlicky T, Endoma MAA, Butora Gabor.** 1996. New chiral synthons from the microbial oxidation of bromonaphthalenes. *Tetrahedron Asymmetry* **7**:61-68.
15. **Resnick SM, Torok DS, Lee K, Brand JM, Gibson DT.** 1994. Regiospecific and stereoselective hydroxylation of 1-indanone and 2-indanone by naphthalene dioxygenase and toluene dioxygenase. *Appl. Environ. Micro.* **60**:3323-3328.
16. **Lee K, Resnick SM, Gibson DT.** 1997. Stereospecific oxidation of (R)- and (S)-1-indanol by naphthalene dioxygenase from *Pseudomonas* sp. strain NCIB 9816-4. *Appl. Environ. Microbiol.* **63**:2067-2070.
17. **Parales RE, Resnick SM, Yu CL, Boyd DR, Sharma ND, Gibson DT.** 2000. Regioselectivity and enantioselectivity of naphthalene dioxygenase during arene cis-dihydroxylation: Control by phenylalanine 352 in the alpha subunit. *J. Bacteriol.* **182**:5495-5504.
18. **Resnick SM, Gibson DT.** 1996. Regio- and stereospecific oxidation of 9,10-dihydroanthracene and 9,10-dihydrophenanthrene by naphthalene dioxygenase: Structure and absolute stereochemistry of metabolites. *Appl. Environ. Micro.* **62**:3355-3359.
19. **Resnick SM, Gibson DT.** 1996. Regio- and stereospecific oxidation of fluorene, dibenzofuran, and dibenzothiophene by naphthalene dioxygenase from *Pseudomonas* sp strain NCIB 9816-4. *Appl. Environ. Micro.* **62**:4073-4080.
20. **Barnsley EA.** 1975. The bacterial degradation of fluoranthene and benzo[*a*]pyrene. *Can. J. Microbiol.* **21**:1004-1008.
21. **Boyd D, Sharma N, Bowers N, Boyle R, Harrison J, Lee K, Bugg T, Gibson D.** 2003. Stereochemical and mechanistic aspects of dioxygenase-catalysed benzylic hydroxylation of indene and chromane substrates. *Org. Biomol. Chem.* **1**:1298-1307.
22. **Ensley BD, BJ R, Osslund TD, Simon MJ, Wackett LP, Gibson D.** 1983. Expression of naphthalene oxidation genes in *Escherichia coli* results in the biosynthesis of indigo. *Science* **222**:167-169.
23. **Chopard C, Bertho G, Prange T.** 2012. Naphthalene-dioxygenase catalysed cis-dihydroxylation of bicyclic azaarenes. *R.S.C. Adv.* **2**:605-615.
24. **Boyd D, Sharma N, McMurray B, Haughey S, Allen C, Hamilton J, McRoberts W, O'Ferrall R, Nikodinovic-Runic J, Coulombel L, O'Connor K.** 2012. Bacterial dioxygenase- and monooxygenase-catalysed sulfoxidation of benzo[*b*]thiophenes. *Org. Biomol. Chem.* **10**:782-790.
25. **Klecka GM, Gibson DT.** 1979. Metabolism of dibenzo[1,4]dioxan by a *Pseudomonas* species. *Biochem. J.* **180**:639-645.
26. **Resnick SM, Torok DS, Gibson DT.** 1993. Oxidation of carbazole to 3-hydroxycarbazole by naphthalene 1,2-dioxygenase and biphenyl 2,3-dioxygenase. *FEMS Microbiol. Lett.* **113**:297-302.
27. **Lee K.** 1999. Benzene-induced uncoupling of naphthalene dioxygenase activity and enzyme inactivation by production of hydrogen peroxide. *J. Bacteriol.* **181**:2719-2725.



28. **Lee K, Gibson DT.** 1996. Toluene and ethylbenzene oxidation by purified naphthalene dioxygenase from *Pseudomonas* sp strain NCIB 9816-4. *Appl. Environ. Microbiol.* **62**:3101-3106.
29. **Lee K, Gibson DT.** 1996. Stereospecific dihydroxylation of the styrene vinyl group by purified naphthalene dioxygenase from *Pseudomonas* sp. strain NCIB 9816-4. *J. Bacteriol.* **178**:3353-3356.
30. **Bowers NI, Boyd DR, Sharma ND, Kennedy MA, Sheldrake GN, Dalton H.** 1998. Stereoselective cis-dihydroxylation of azulene and related non-aromatic polyenes. *Tetrahedron Asymmetry* **9**:1831-1834.
31. **Lee K.** 2006. p-hydroxylation reactions catalyzed by naphthalene dioxygenase. *FEMS Microbiol Lett.* **255**:316-320.
32. **Resnick SM, Gibson DT.** 1993. Biotransformation of anisole and phenetole by aerobic hydrocarbonoxidizing bacteria. *Biodegradation* **4**:195-203.
33. **Modyanova L, Azerad R.** 2000. Dioxygenase-catalysed formation of dihydrodiol metabolites of N-methyl-2-pyridone. *Tetrahedron Lett.* **41**:3865-3869.
34. **Lee K, Brand JM, Gibson DT.** 1995. Stereospecific sulfoxidation by toluene and naphthalene dioxygenases. *Biochem. Biophys. Res. Commun.* **212**:9-15.
35. **Kerridge A, Willetts A, Holland H.** 1999. Stereoselective oxidation of sulfides by cloned naphthalene dioxygenase. *J. Mol. Catal. B Enzym.* **6**:59-65.
36. **Königsberger K, Hudlicky T.** 1993. Microbial oxidation of 2-bromostyrene by *Pseudomonas putida* 39/D. Isolation and identification of metabolites. *Tetrahedron Asymmetry* **4**:2469-2474.

TABLE S2 Composition of three water mixtures used to assay *Pseudomonas* NCIB 9816-4 activity

| Mixture #1             | µg/mL | Mixture #2                  | µg /mL | Mixture #3                | µg /mL |
|------------------------|-------|-----------------------------|--------|---------------------------|--------|
| 1,1-diphenylethylene   | 0.2   | aniline                     | 1.6    | tetralin                  | 2.3    |
| quinoline              | 0.2   | cyclooctane                 | 1.3    | cyclopropylbenzene        | 2.3    |
| benzothiophene         | 0.2   | isododecane                 | 1.2    | 1-phenyl naphthalene      | 2.6    |
| 1,2,3-trimethylbenzene | 0.2   | 1,2 dimethylnaphthalene     | 0.8    | <i>cis</i> -stilbene      | 2.4    |
| 1,3,5-trimethylbenzene | 0.2   | indan                       | 0.8    | isochroman                | 2.6    |
| 1,2,4-trimethylbenzene | 0.2   | p-cymene                    | 0.7    | 2,3 benzofuran            | 2.6    |
| bicyclohexane          | 0.2   | 1,2,3,4-tetrahydroquinoline | 0.8    | spiro[2.4]hepta-4,6-diene | 2.2    |
| 1,4-diisopropylbenzene | 0.2   | <i>cis</i> -decalin         | 0.7    | norbornadiene             | 2.2    |
| acenaphthene           | 0.5   | <i>trans</i> -decalin       | 0.7    | fluorene                  | 3.2    |
| acenaphthylene         | 0.2   | diphenyl sulfide            | 0.9    | fluoranthene              | 1.2    |
| admantane              | 0.3   | azulene                     | 0.8    | <i>m</i> -terphenyl       | 0.9    |
| bibenzyl               | 0.3   | 1-methylphenanthrene        | 0.6    | benzophenone              | 2.2    |
| biphenylene            | 0.1   | naphthalene                 | 1.5    | diphenylmethane           | 2.2    |
| pyrene                 | 0.6   | hexa-methyl benzene         | 1.1    | xanthene                  | 3.0    |
| triphenylene           | 0.3   | diphenyl ether              | 1.6    |                           |        |
| triphenylmethane       | 0.2   | norbornane                  | 0.9    |                           |        |
| <i>trans</i> -stilbene | 0.6   | norbornylene                | 1.3    |                           |        |
| biphenyl               | 0.6   |                             |        |                           |        |
| fluorene               | 0.4   |                             |        |                           |        |
| phenanthrene           | 0.5   |                             |        |                           |        |

TABLE S3 Estimated relative product yields<sup>a</sup>

| Substrate                        | product 1 | product 2 | product 3 | unreacted    |
|----------------------------------|-----------|-----------|-----------|--------------|
| spiroheptadiene                  | 1         | <1        |           | 5            |
| spiro [cyclopropane-1,1'-indene] | 2         | 3         |           | not detected |
| diphenyl methane                 | 50        |           |           | 50           |
| cyclohexylbenzene                | 80        | 10        |           | 10           |
| phenylnaphthalene                | 5         | 10        | 85        | 30           |
| diphenyl ether                   | 6         |           |           | 10           |
| cyclopropylbenzene               | 1         | 1         | 1         | 45           |
| 1,1-diphenylethylene             | 15        | 15        | 40        | 10           |
| tetralin                         | 2         |           |           | not detected |
| <i>trans</i> -decalin            | 4         | 3         |           | 55           |

<sup>a</sup> Reported as percent of starting material GC/FID peak area. Products are listed in the same order as in the figures with corresponding mass spectra.

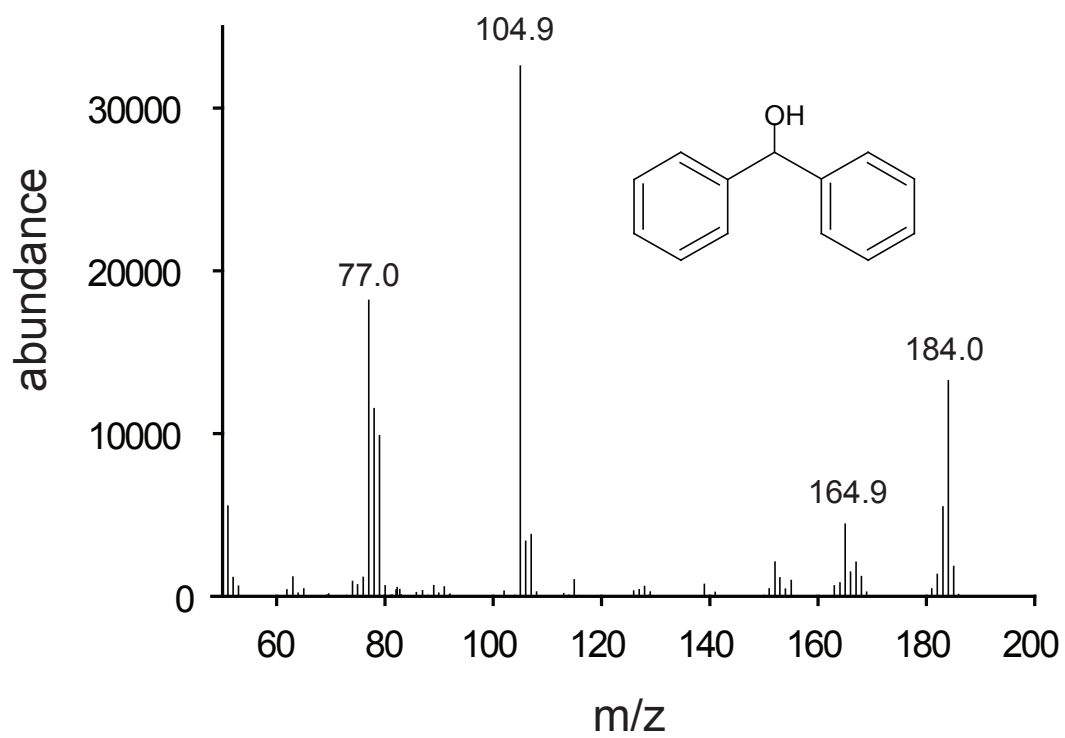

Figure S1 Mass spectrum of product of NDO reaction with diphenylmethane putatively identified as diphenylmethanol.

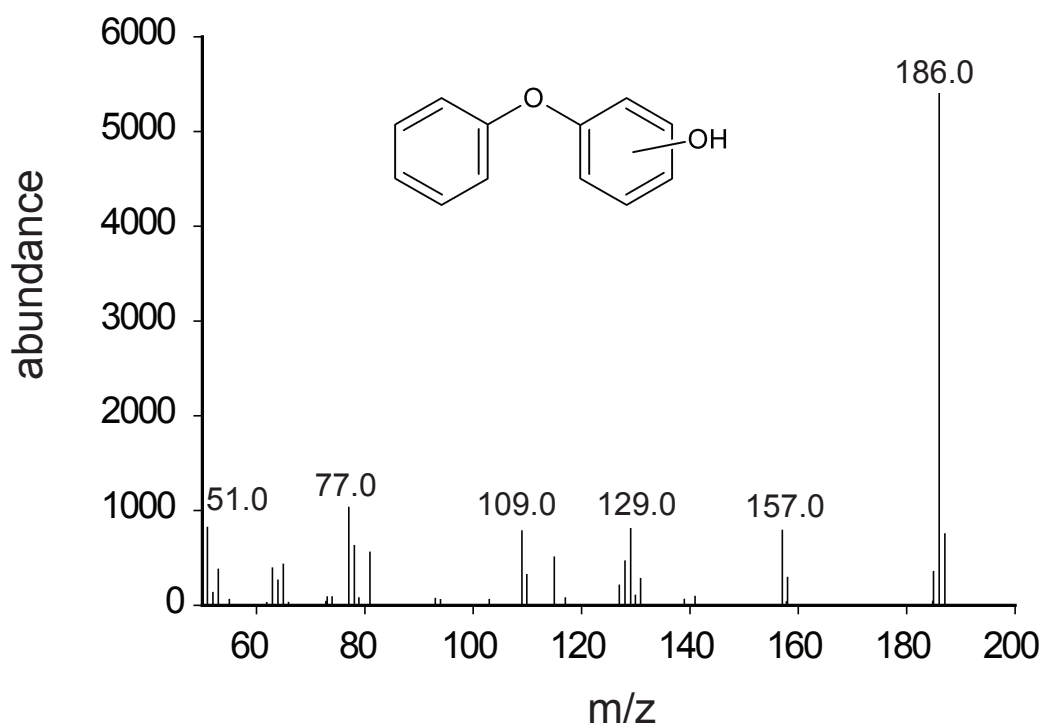

Figure S2 Mass spectrum of product of NDO reaction with diphenyl ether putatively identified as a phenoxy phenol. The exact position of the hydroxyl group was not determined.

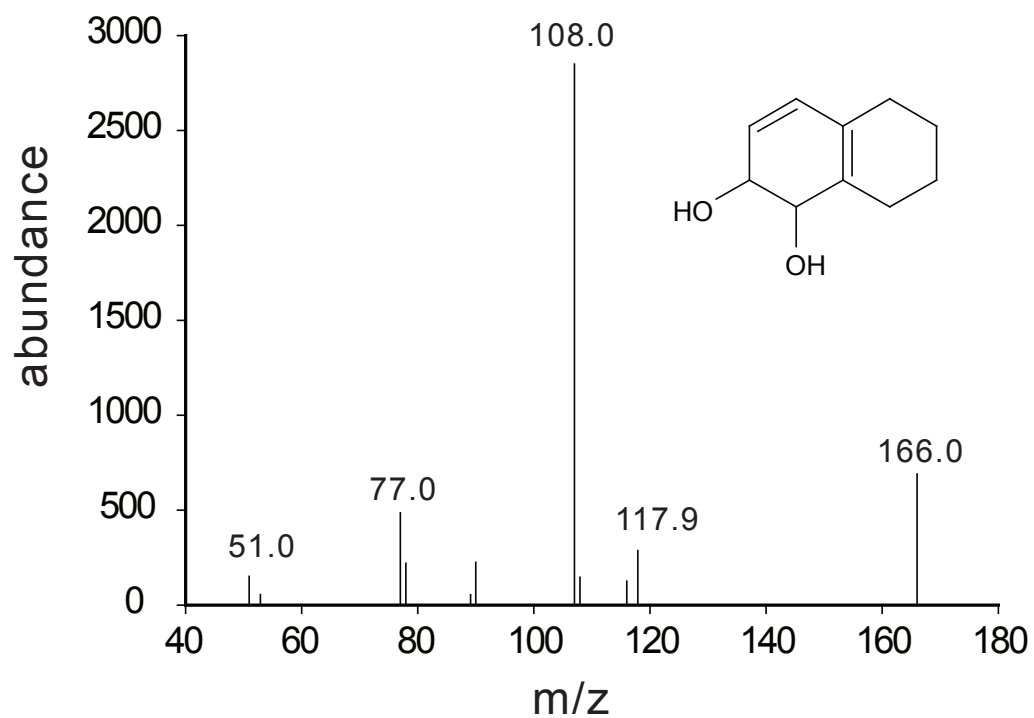

Figure S3 Mass spectrum of product of NDO reaction with tetralin putatively identified as 1,2,5,6,7,8-hexahydro-1,2-naphthalenediol. The exact position of the diol was not determined and could be 2,3-naphthalenediol.

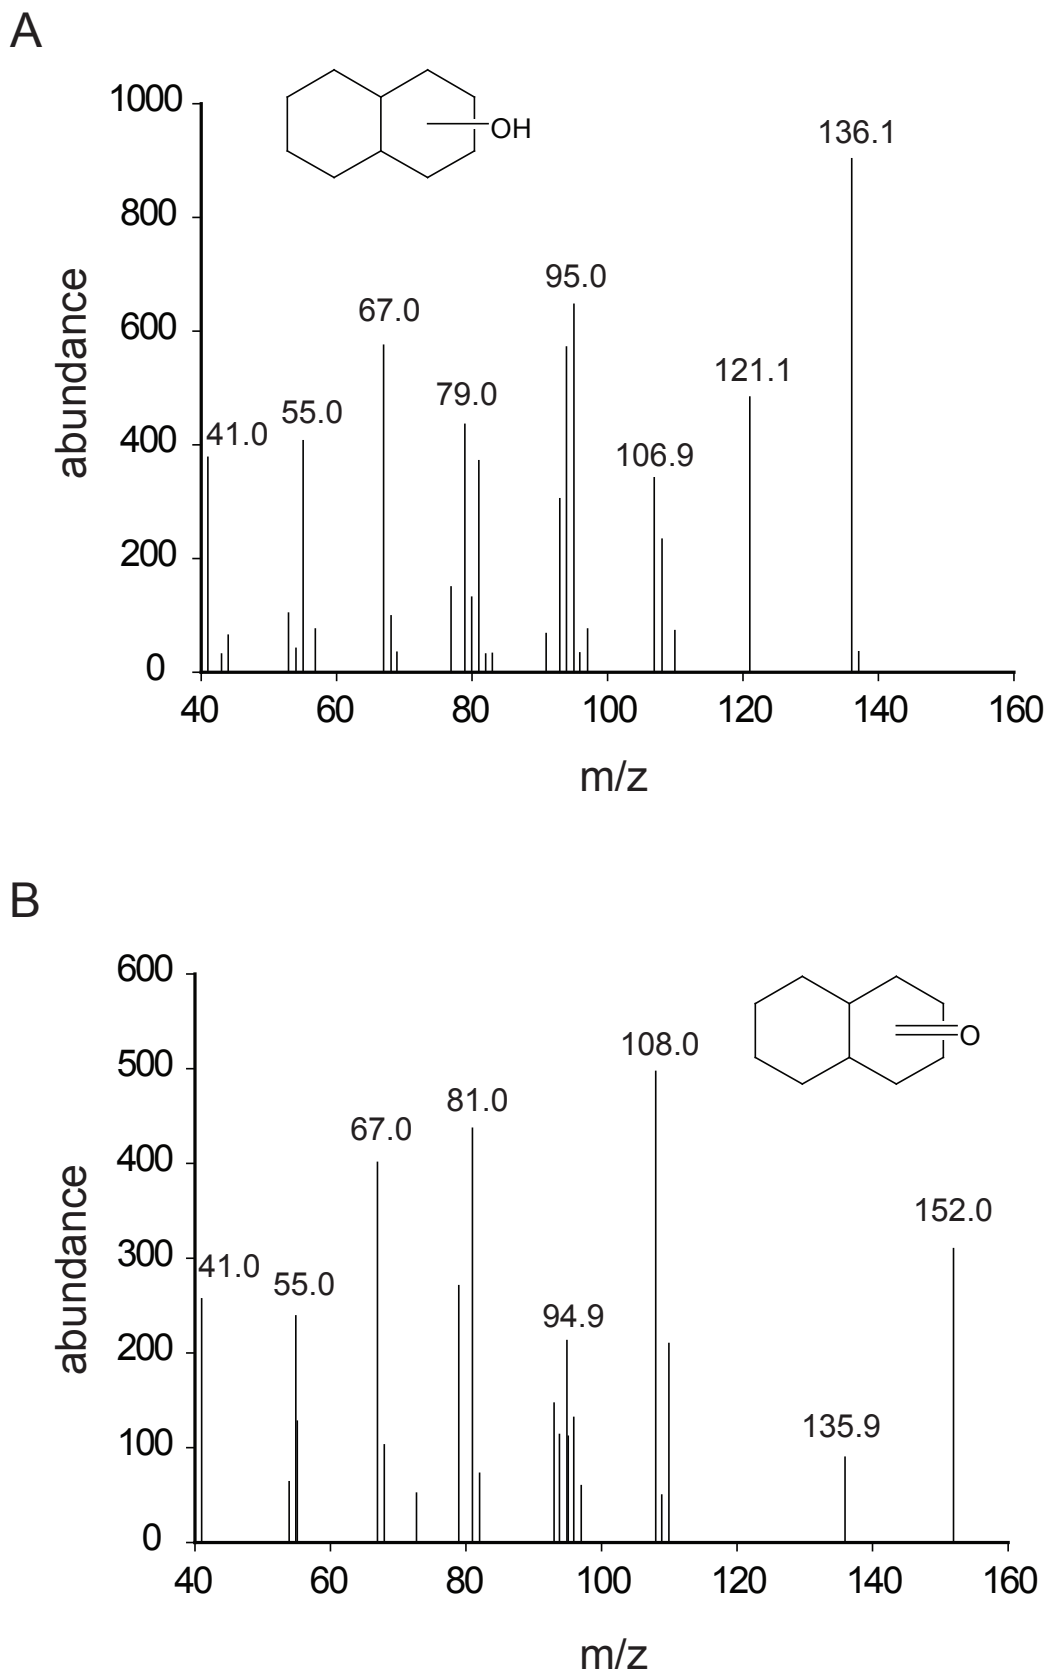

Figure S4 Mass spectra of products of NDO reaction with trans-decalin putatively identified as (A) decahydro-naphthalenol and (B) octahydro-naphthalenone. The positions of the hydroxy and ketones were not determined.
